# Supplementary material for: Converging Fate of the Oxidation and Reduction of 8-Thioguanosine
Source: Molecules. 2019 Aug 29;24(17):3143. doi: 10.3390/molecules24173143 (PMC6749358; doi:10.3390/molecules24173143)
Supplement: Supplementary file 1 [file molecules-24-03143-s001.pdf]

# Converging fate of the oxidation and reduction of 8-thioguanosine

Katarzyna Taras- Goslinska <sup>1†</sup>, Fabrizio Vetica <sup>2,3†</sup>, Sebastián Barata-Vallejo<sup>3,4</sup>, Virginia Triantakostanti <sup>3</sup>,  
Bronisław Marciniak <sup>1,5</sup>, and Chrysostomos Chatgililoglu <sup>2,3,5\*</sup>

## Supporting Information

|                                                              |   |
|--------------------------------------------------------------|---|
| <i>1. NMR analysis</i>                                       | 2 |
| <i>2. Reaction of <math>Br_2^{\bullet-}</math> with 8-TG</i> | 4 |
| <i>3. Reaction of <math>N_3^{\bullet}</math> with 8-TG</i>   | 5 |
| <i>4. Reaction of 8-TG with <math>H_2O_2</math></i>          | 5 |
| <i>5. Reactions in the presence of POPC liposomes</i>        | 6 |

## 1. NMR analysis

### 8-mercaptoguanosine (8-TG, 1)

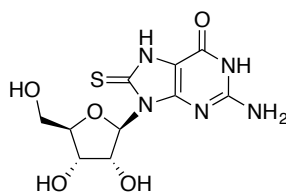

1

<sup>1</sup>H NMR (500 MHz, DMSO-d<sub>6</sub>)  $\delta$  = 12.63 (s, 1H), 11.13 (s, 1H), 6.54 (s, 2H), 6.25 (d,  $J$  = 5.5 Hz, 1H), 5.24 (d,  $J$  = 5.9 Hz, 1H), 4.95 (q,  $J$  = 5.1 Hz, 1H), 4.92 – 4.80 (m, 1H), 4.77 (t,  $J$  = 5.4 Hz, 1H), 4.21 (s, 1H), 3.79 (q,  $J$  = 4.6 Hz, 1H), 3.65 (dt,  $J$  = 11.1, 4.3 Hz, 1H), 3.49 (dt,  $J$  = 11.8, 5.9 Hz, 1H). ppm. <sup>1</sup>H NMR (500 MHz, DMSO-d<sub>6</sub> + D<sub>2</sub>O)  $\delta$  = 6.25 (d,  $J$  = 5.9 Hz, 1H), 4.89 (t,  $J$  = 5.8 Hz, 1H), 4.29 – 4.23 (m, 1H), 3.88 (q,  $J$  = 4.2 Hz, 1H), 3.67 (dd,  $J$  = 12.2, 3.7 Hz, 1H), 3.56 (dd,  $J$  = 12.2, 5.1 Hz, 1H) ppm.

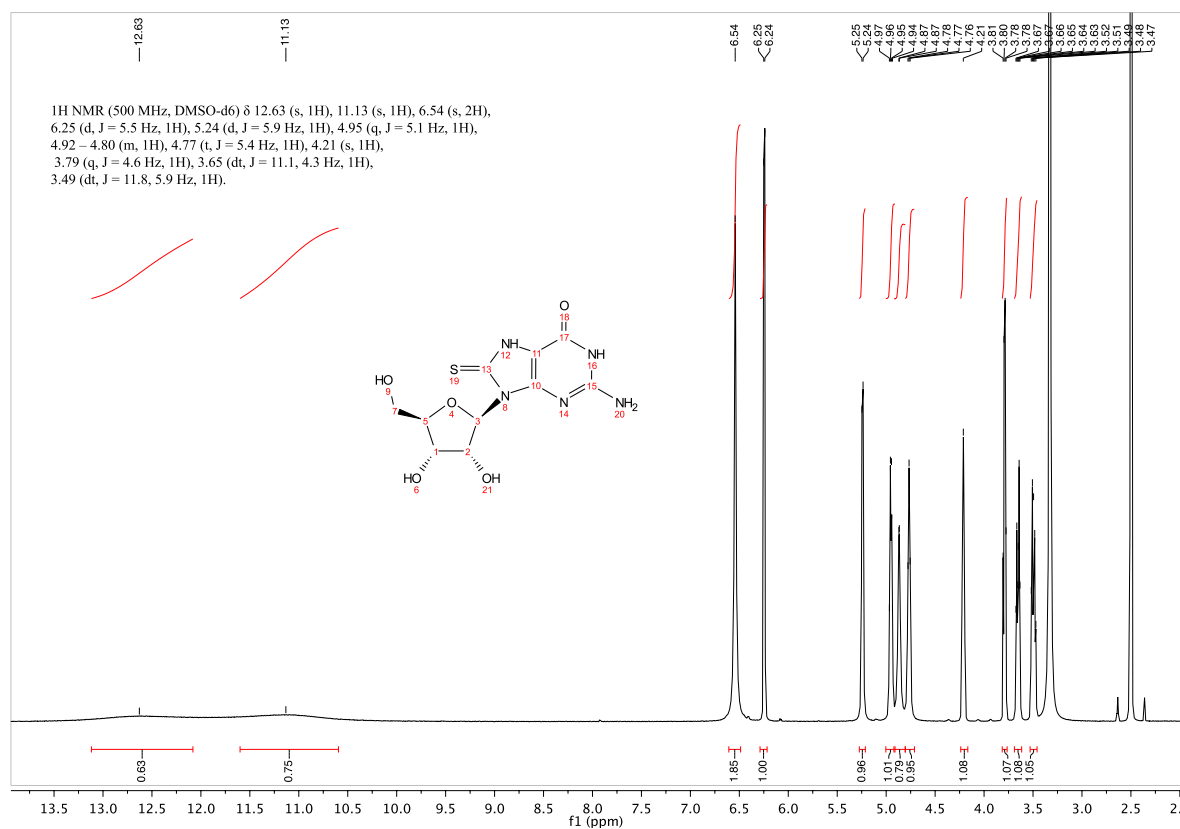

Figure S1 <sup>1</sup>H NMR spectrum of 8-TG

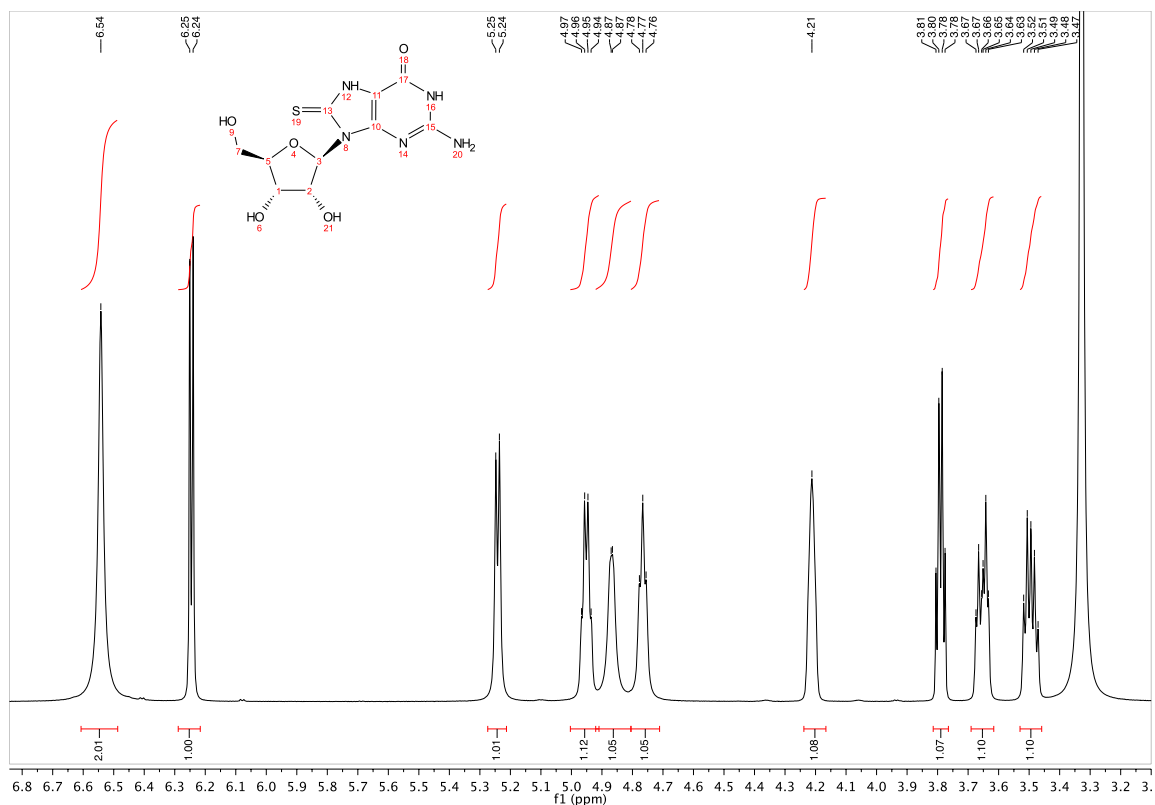

**Figure S2** Zoomed  $^1\text{H}$  NMR spectrum of 8-TG

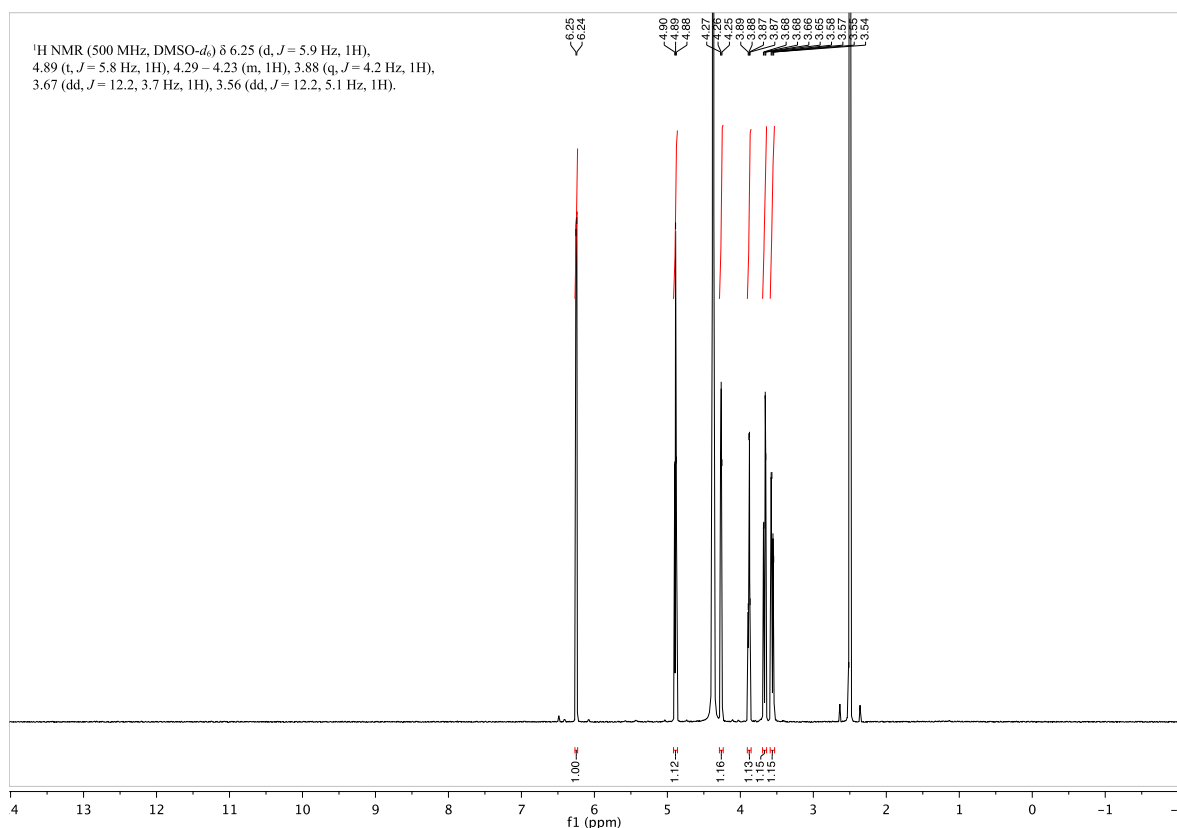

**Figure S3**  $^1\text{H}$  NMR spectrum of 8-TG after adding  $\text{D}_2\text{O}$

## 2. Reaction of $\text{Br}_2^{\cdot-}$ with 8-TG

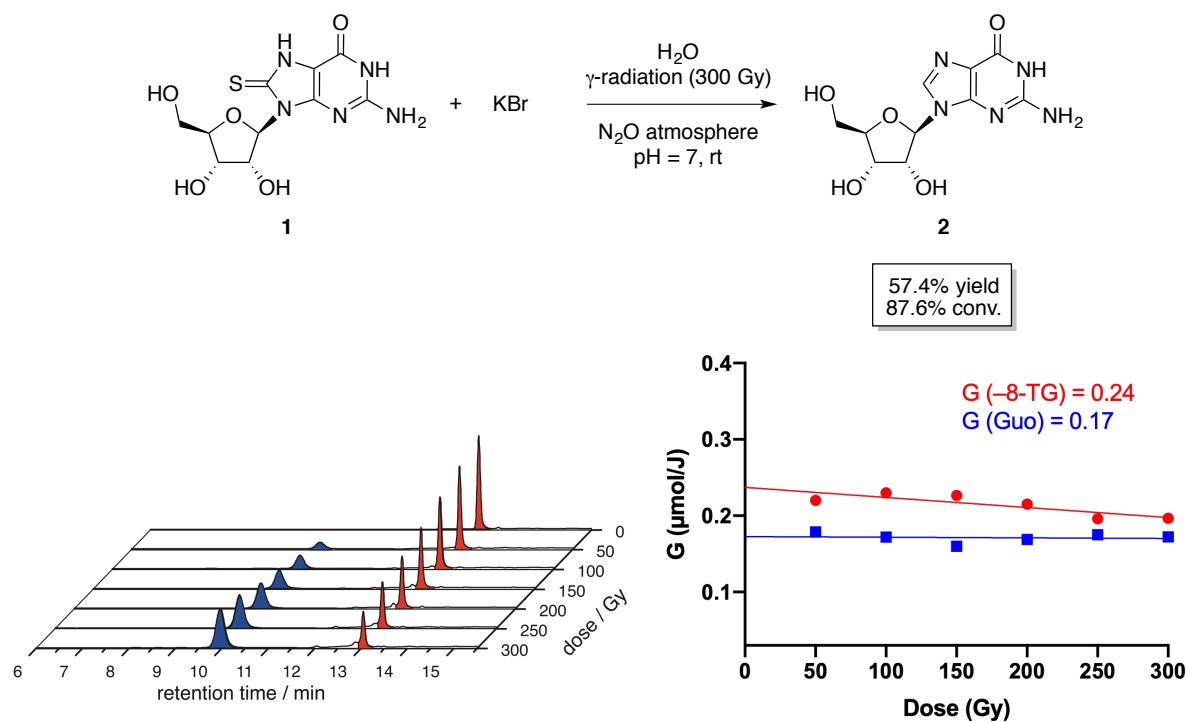

**Figure S4** Reaction of  $\text{Br}_2^{\cdot-}$  with 8-TG.  $\gamma$ -radiolysis of **1** (0.09 mM) in  $\text{N}_2\text{O}$ -purged water at natural pH, containing KBr (0.1 M) at a dose rate of  $1.85 \text{ Gy min}^{-1}$ . A) HPLC runs of the reactions. The HPLC peaks of **1** are highlighted in red, while the peaks of guanosine (**2**) are highlighted in blue. B) The chemical irradiation yields  $G(-1)$  (●) and  $G(2)$  (■) as function of the irradiation dose. The line extrapolation to a zero dose leads to the  $G$  values reported on the graph.

### 3. Reaction of $N_3^{\bullet}$ with 8-TG

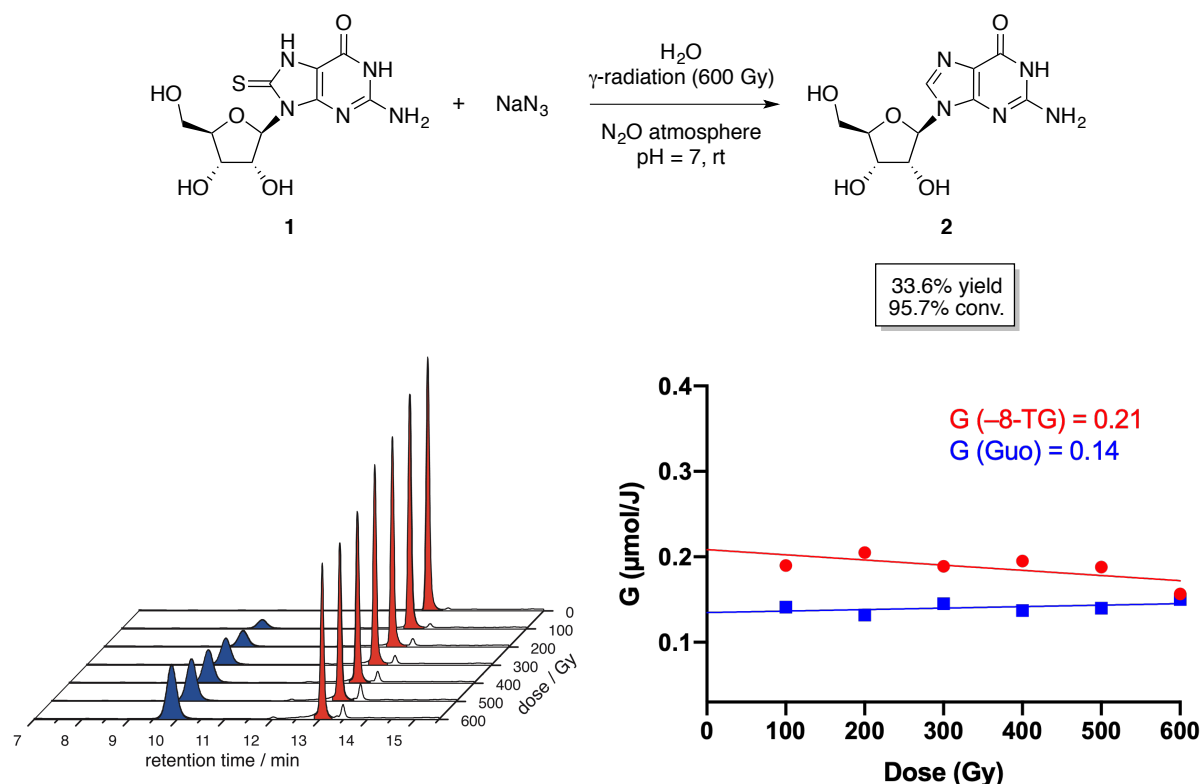

**Figure S5** Reaction of  $N_3^{\bullet}$  with 8-TG.  $\gamma$ -radiolysis of **1** (0.27 mM) in  $N_2O$ -purged water at natural pH, containing  $NaN_3$  (0.1 M) at a dose rate of  $1.85 \text{ Gy min}^{-1}$ . A) HPLC runs of the reactions. The HPLC peaks of **1** are highlighted in red, while the peaks of guanosine (**2**) are highlighted in blue. B) The chemical irradiation yields  $G(-1)$  (●) and  $G(2)$  (■) as function of the irradiation dose. The line extrapolation to a zero dose leads to the  $G$  values reported on the graph.

### 4. Reaction of 8-TG with $H_2O_2$

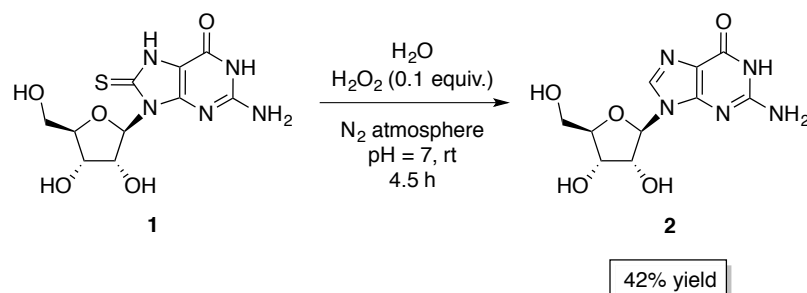

**Figure S6** Reaction of 8-TG in the presence of  $H_2O_2$  outside Gammacell.

8-TG (0.3 mM) and  $H_2O_2$  (30% water solution, 0.1 equiv.) were dissolved in 2 mL water. The solution was saturated with  $N_2$  for 7 min and left without stirring for 4.5 h (corresponding to an irradiation of 500 Gy if the reaction was carried out in Gammacell). After the irradiation time, the solution was analysed *via* HPLC.

## 5. Reactions in the presence of POPC liposomes

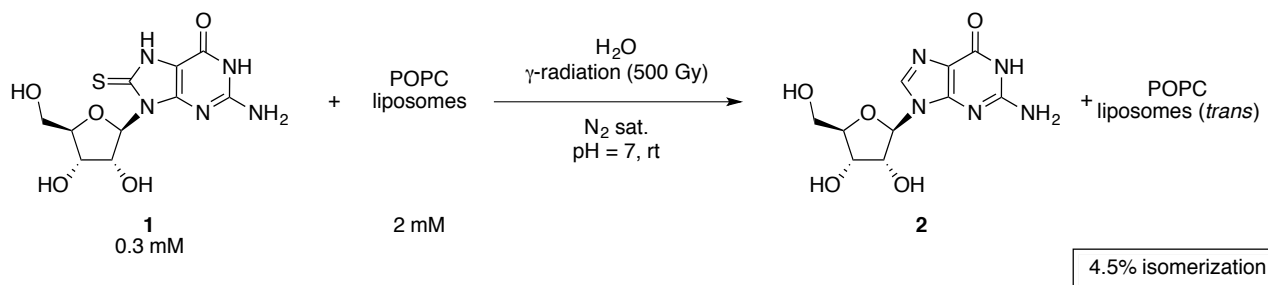

**Figure S7** Reaction of  $\text{HO}^\bullet$ ,  $\text{H}^\bullet$ , and  $\text{e}_{\text{aq}}^-$  with 8-TG in the presence of POPC liposomes.  $\gamma$ -radiolysis of **1** (0.3 mM) in  $\text{N}_2$ -purged water at natural pH, containing POPC liposomes (2 mM), at a dose rate of  $1.85 \text{ Gy min}^{-1}$ . The level of isomerization was determined *via* GC analysis.

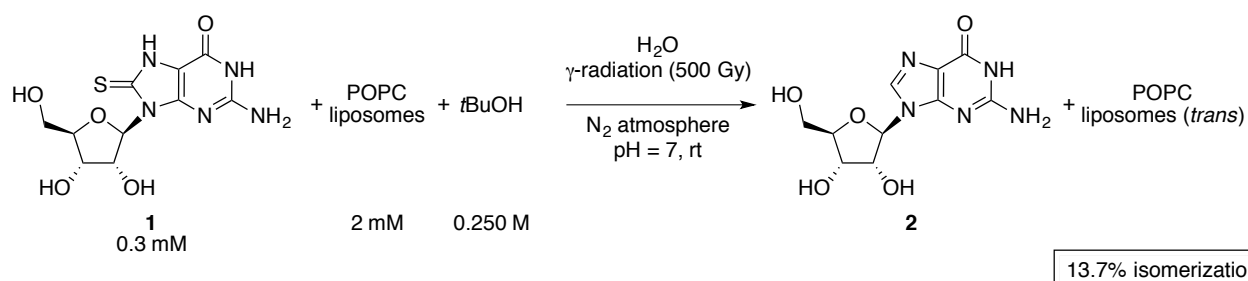

**Figure S8** Reaction of  $\text{e}_{\text{aq}}^-$  with 8-TG in the presence of POPC liposomes.  $\gamma$ -radiolysis of **1** (0.3 mM) in  $\text{N}_2$ -purged water at natural pH, containing POPC liposomes (2 mM) and *t*BuOH (0.25 M), at a dose rate of  $1.85 \text{ Gy min}^{-1}$ . The level of isomerization was determined *via* GC analysis.

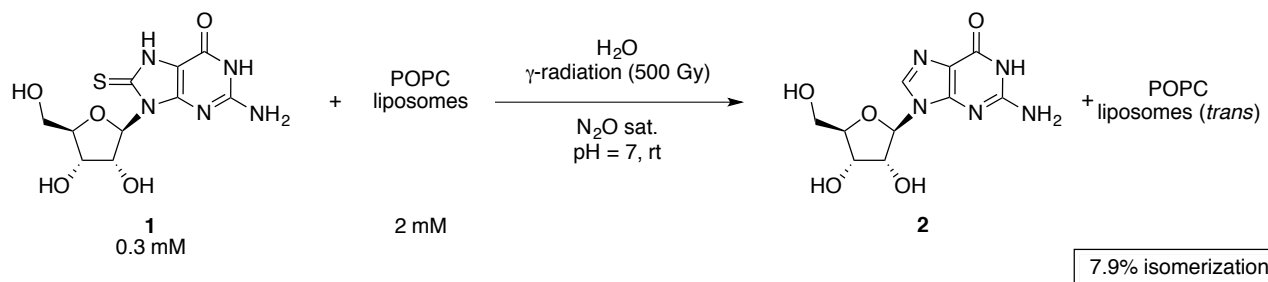

**Figure S9** Reaction of  $\text{HO}^\bullet$  with 8-TG in the presence of POPC liposomes.  $\gamma$ -radiolysis of **1** (0.3 mM) in  $\text{N}_2\text{O}$ -purged water at natural pH, containing POPC liposomes (2 mM), at a dose rate of  $1.85 \text{ Gy min}^{-1}$ . The level of isomerization was determined *via* GC analysis.

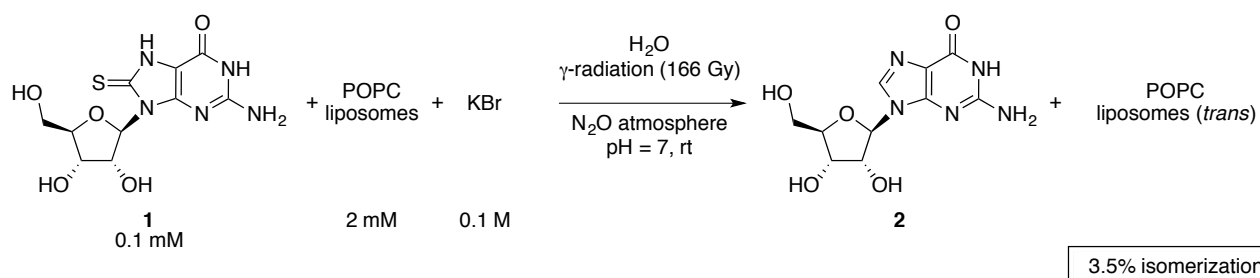

**Figure S10** Reaction of  $\text{Br}_2^{\bullet-}$  with 8-TG in the presence of POPC liposomes.  $\gamma$ -radiolysis of **1** (0.1 mM) in  $\text{N}_2\text{O}$ -purged water at natural pH, containing POPC liposomes (2 mM) and KBr (0.1 M), at a dose rate of  $1.85 \text{ Gy min}^{-1}$ . The level of isomerization was determined *via* GC analysis.

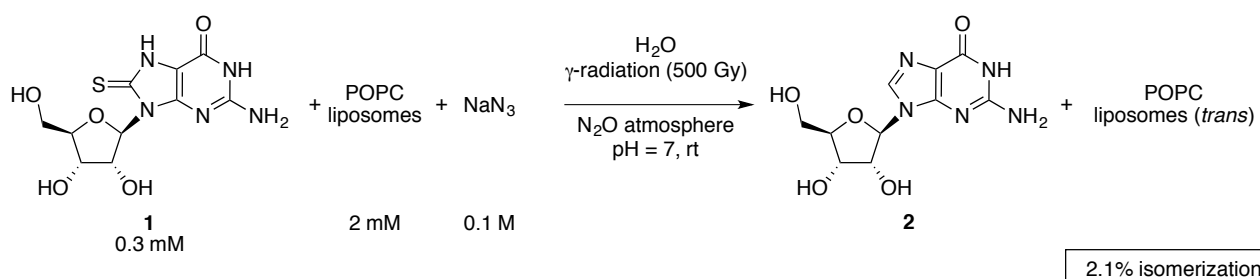

**Figure S11** Reaction of  $\text{N}_3^{\bullet}$  with 8-TG in the presence of POPC liposomes.  $\gamma$ -radiolysis of **1** (0.3 mM) in  $\text{N}_2\text{O}$ -purged water at natural pH, containing POPC liposomes (2 mM) and  $\text{NaN}_3$  (0.1 M), at a dose rate of  $1.85 \text{ Gy min}^{-1}$ . The level of isomerization was determined *via* GC analysis.

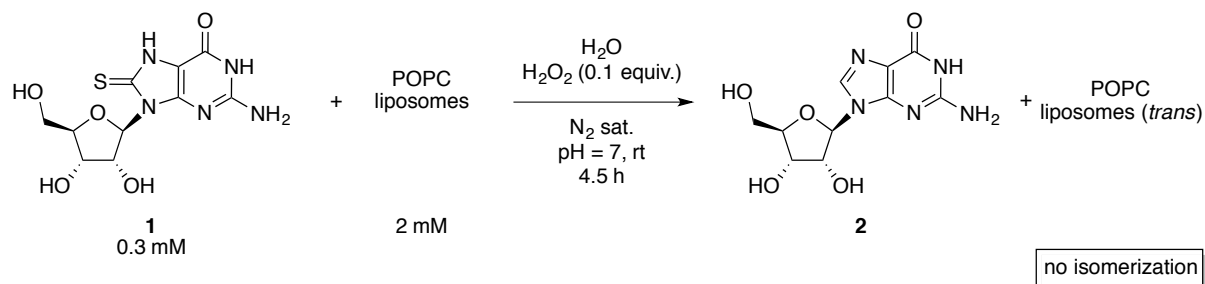

**Figure S12** Reaction of  $\text{H}_2\text{O}_2$  with 8-TG in the presence of POPC liposomes. Reaction of **1** (0.3 mM) and  $\text{H}_2\text{O}_2$  (0.1 equiv.) in  $\text{N}_2$ -purged water at natural pH, containing POPC liposomes (2 mM), at a dose rate of  $1.85 \text{ Gy min}^{-1}$ . The level of isomerization was determined *via* GC analysis.
